# Supplementary material for: Quality Improvement in Neurology: Dementia Management Quality Measurement Set Update
Source: Atypon-hosted journal article supplement (doi:10.1176/appi.ajp.2017.17401), 2017-05-01
Supplement: AppendixE1.pdf [file AppendixE1.pdf]

 


Psychiatry Online
